# Supplementary material for: Bcl-xL Is Required by Primary Hippocampal Neurons during Development to Support Local Energy Metabolism at Neurites
Source: MDPI journal article supplement (doi:10.3390/biology10080772), 2021-08-13
Supplement: s1 [file s1]

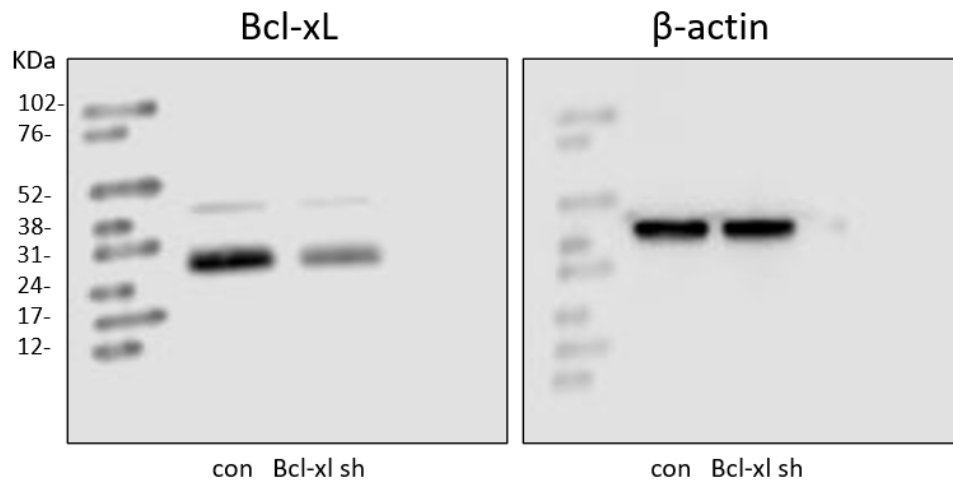

**Supplement S1. Primary hippocampal neurons transduced with Bcl-xL shRNA decreased protein levels of Bcl-xL.** Primary rat hippocampal neurons were transduced with control shRNA or Bcl-xL shRNA. Depletion of Bcl-xL protein levels in Bcl-xL shRNA transduced neurons was shown via immunoblotting.

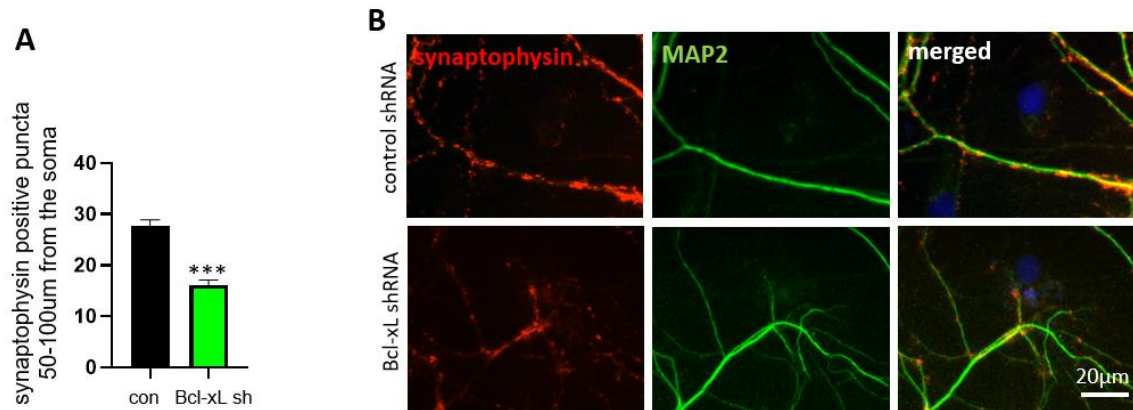

**Supplement S2. Bcl-xL depletion decreases synaptophysin positive puncta.** Immunocytochemistry (**A-B**) was performed and synaptophysin positive puncta were counted from 50-100µm from the soma. Bcl-xL depleted neurons show a significant decrease in synaptophysin positive puncta (n=42). \*\*\* $P < 0.001$ , two-tailed Student's  $t$ -test. Red, synaptophysin; Green, MAP2, Blue, DAPI, Scale bar=20µm.
